# Supplementary material
Source: PubMed Central journal article supplement (PMC3039336)
Supplement: supp_M110.196766_jbc.M110.196766-1.pdf [file supp_M110.196766_jbc.M110.196766-1.pdf]

Supplemental Material

**RNA 3'-phosphate cyclase (RtcA) catalyzes ligase-like adenylation  
of DNA and RNA 5'-monophosphate ends**

Anupam K. Chakravarty and Stewart Shuman

Molecular Biology Program, Sloan-Kettering Institute, New York, NY 10065

Supplemental Figures S1 and S2

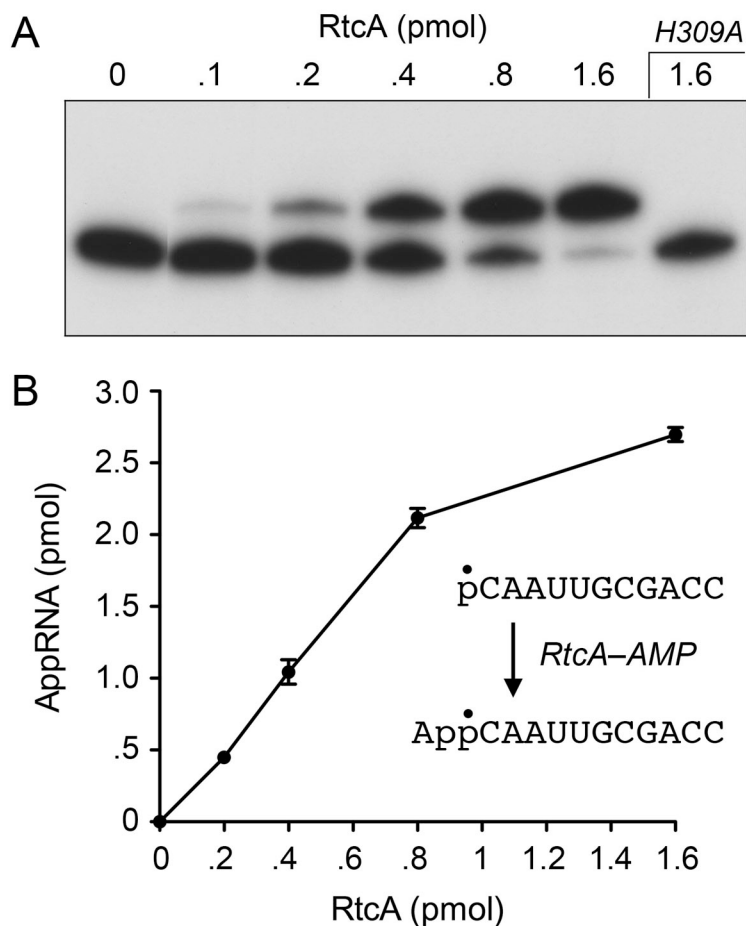

Figure S1. **RtcA adenylylates a 5'-phosphate RNA end.** (A) Reaction mixtures (10  $\mu$ l) containing 50 mM Tris-acetate (pH 6.0), 1 mM DTT, 2 mM  $\text{MgCl}_2$ , 1 mM ATP, 3 pmol (300 nM) 5'  $^{32}\text{P}$ -labeled 12-mer RNA (5'-pCAAUUGCGACC<sub>OH</sub>), and RtcA as specified were incubated for 30 min at 37°C. The products were analyzed by urea-PAGE and visualized by autoradiography. (B) The extents of conversion of the pDNA strand to AppDNA product were quantified and plotted as a function of input RtcA. Each datum is the average of three independent enzyme titration experiments  $\pm$  SEM.

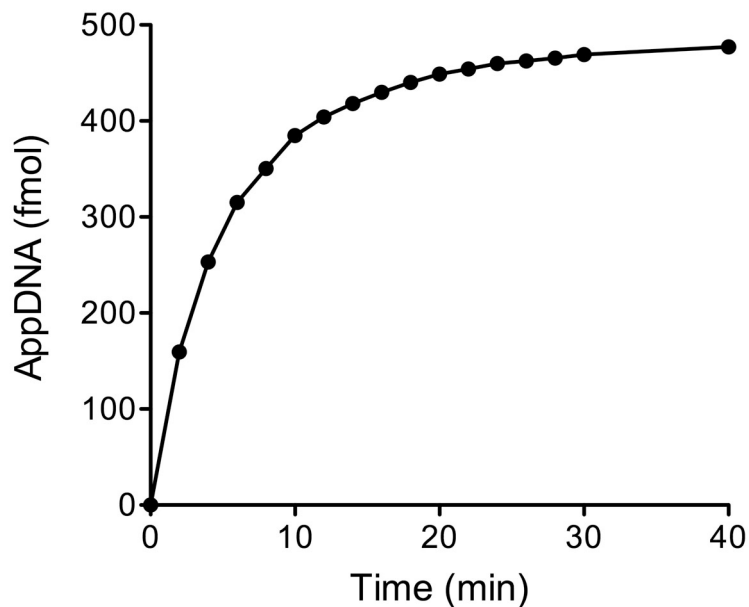

Figure S2. **5'-Adenylation in the absence of magnesium and ATP.** A reaction mixture (190  $\mu$ l) containing 50 mM Tris-HCl (pH 7.4), 5 mM DTT, 9.5 pmol (50 nM) 5'  $^{32}$ P-labeled 12-mer RNA (5'-pCAAUUGCGACC<sub>OH</sub>), and 266 pmol (1.4  $\mu$ M) RtcA [corresponding to  $\sim$ 630 nM RtcA-AMP] was incubated at 37°C. Aliquots (10  $\mu$ l, containing 0.5 pmol of 12-mer DNA) were withdrawn at the times specified and quenched immediately with formamide-EDTA. The time 0 sample was withdrawn prior to adding the RtcA. The extents of conversion of the pDNA strand to AppDNA product are plotted as a function of reaction time.
